# Supplementary material
Source: publisher figshare collection journal article supplement (https://acs.figshare.com/ndownloader/files/5696358)
Supplement: Supplementary file 1 [file 5696358]

data_global

#===================================================================

_audit_creation_method        'manual editing of form.cif'

# PROCESSING SUMMARY (IUCr Office Use Only)

_journal_data_validation_number      ?

_journal_date_recd_electronic        ?
_journal_date_to_coeditor            ?
_journal_date_from_coeditor          ?
_journal_date_accepted               ?
_journal_date_printers_first         ?
_journal_date_printers_final         ?
_journal_date_proofs_out             ?
_journal_date_proofs_in              ?
_journal_coeditor_name               ?
_journal_coeditor_code               ?
_journal_coeditor_notes
; ?
;
_journal_techeditor_code             ?
_journal_techeditor_notes
; ?
;
_journal_coden_ASTM                  ?
_journal_name_full                   ?
_journal_year                        ?
_journal_volume                      ?
_journal_issue                       ?
_journal_page_first                  ?
_journal_page_last                   ?
_journal_paper_category              ?
_journal_suppl_publ_number           ?
_journal_suppl_publ_pages            ?

#===================================================================


# SUBMISSION DETAILS

_publ_contact_author_name     'Krzysztof Wozniak'
_publ_contact_author_address
;	Chemistry Department
	The University of Warsaw
	ul. Pasteura 1
	02 093 Warszawa
	Poland
;
_publ_contact_author_email    kwozniak@chem.uw.edu.pl
_publ_contact_author_fax          '48(22)8222892'
_publ_contact_author_phone        '48(22)8222892'

_publ_contact_letter
; Please consider this CIF submission as a supplementary information
for publication in JACS
;
_publ_requested_journal    'Inorganic Chemistry'
_publ_requested_category          FM


# TITLE AND AUTHOR LIST

_publ_section_title
; H-Bonding Dependent Structures of (NH4+)3H+(SO42-)2
- Mechanisms of Phase Transitions
;
_publ_section_title_footnote
; Contribution No. ...
;


loop_
_publ_author_name
:'Paulina M. Dominiak, Joanna Herold, Waclaw Kolodziejski and Krzysztof
Wozniak*
'
_publ_author_footnote
_publ_author_address
'[*] Dr hab. K. Wozniak'
;	Chemistry Department, Warsaw University,
	ul. Pasteura 1, 02-093 Warszawa, Poland.
;
'	Paulina M. Dominiak'
;	Chemistry Department, Warsaw University,
	ul. Pasteura 1, 02-093 Warszawa, Poland.
;
'	Joanna Herold, Waclaw Kolodziejski'
;	Department of Inorganic and Analytical Chemistry, Medical 
University of
Warsaw,
ul. Banacha 1, 02-097 Warszawa, Poland.
;
# TEXT

_publ_section_abstract
;
;


_publ_section_comment
;
;
_publ_section_acknowledgements                  ?

_publ_section_references
;
;

_publ_section_figure_captions
;
;

_publ_section_exptl_prep
;
;

_publ_section_exptl_refinement
;
;

##########################################################

data_PhaseII

_audit_creation_method            'SHELXL-97'
_chemical_name_systematic
;
triammonium hydrogen disulphate
;
_chemical_name_common             ?
_chemical_melting_point           ?
_chemical_formula_moiety          (NH4)3H(SO4)2
_chemical_formula_sum
'H13 N3 O8 S2'
_chemical_formula_weight          247.25

loop_
_atom_type_symbol
_atom_type_description
_atom_type_scat_dispersion_real
_atom_type_scat_dispersion_imag
_atom_type_scat_source
'N'  'N'   0.0061   0.0033
'International Tables Vol C Tables 4.2.6.8 and 6.1.1.4'
'H'  'H'   0.0000   0.0000
'International Tables Vol C Tables 4.2.6.8 and 6.1.1.4'
'O'  'O'   0.0106   0.0060
'International Tables Vol C Tables 4.2.6.8 and 6.1.1.4'
'S'  'S'   0.1246   0.1234
'International Tables Vol C Tables 4.2.6.8 and 6.1.1.4'

_symmetry_cell_setting            ?
_symmetry_space_group_name_H-M    ?

loop_
_symmetry_equiv_pos_as_xyz
'x, y, z'
'-x, y, -z+1/2'
'x+1/2, y+1/2, z'
'-x+1/2, y+1/2, -z+1/2'
'-x, -y, -z'
'x, -y, z-1/2'
'-x+1/2, -y+1/2, -z'
'x+1/2, -y+1/2, z-1/2'

_cell_length_a                    15.390(3)
_cell_length_b                    5.8480(12)
_cell_length_c                    10.140(2)
_cell_angle_alpha                 90.00
_cell_angle_beta                  101.81(3)
_cell_angle_gamma                 90.00
_cell_volume                      893.3(3)
_cell_formula_units_Z             4
_cell_measurement_temperature     297(2)
_cell_measurement_reflns_used     5000
_cell_measurement_theta_min       4
_cell_measurement_theta_max       45

_exptl_crystal_description        ?
_exptl_crystal_colour             colourless
_exptl_crystal_size_max           0.7
_exptl_crystal_size_mid           0.7
_exptl_crystal_size_min           0.6
_exptl_crystal_density_meas       ?
_exptl_crystal_density_diffrn     1.838
_exptl_crystal_density_method     'not measured'
_exptl_crystal_F_000              520
_exptl_absorpt_coefficient_mu     0.623
_exptl_absorpt_correction_type    ?
_exptl_absorpt_correction_T_min   ?
_exptl_absorpt_correction_T_max   ?
_exptl_absorpt_process_details    ?

_exptl_special_details
;
?
;

_diffrn_ambient_temperature       293(2)
_diffrn_radiation_wavelength      0.71073
_diffrn_radiation_type            MoK\a
_diffrn_radiation_source          'fine-focus sealed tube'
_diffrn_radiation_monochromator   graphite
_diffrn_measurement_device_type   KM4CCD
_diffrn_measurement_method        omega scan
_diffrn_detector_area_resol_mean  1024
_diffrn_standards_number          1 frame
_diffrn_standards_interval_count  50 frames
_diffrn_standards_interval_time   ?
_diffrn_standards_decay_%         2
_diffrn_reflns_number             7795
_diffrn_reflns_av_R_equivalents   0.0390
_diffrn_reflns_av_sigmaI/netI     0.0208
_diffrn_reflns_limit_h_min        -20
_diffrn_reflns_limit_h_max        20
_diffrn_reflns_limit_k_min        -7
_diffrn_reflns_limit_k_max        7
_diffrn_reflns_limit_l_min        -13
_diffrn_reflns_limit_l_max        13
_diffrn_reflns_theta_min          3.74
_diffrn_reflns_theta_max          28.80
_reflns_number_total              1115
_reflns_number_gt                 962
_reflns_threshold_expression      >2sigma(I)

_computing_data_collection        'CrysAlisCCD'
_computing_cell_refinement        'CrysAlisRED'
_computing_data_reduction         'CrysAlisRED'
_computing_structure_solution     'SHELXS-97 (Sheldrick, 1990)'
_computing_structure_refinement   'SHELXL-97 (Sheldrick, 1997)'
_computing_molecular_graphics     'Diamond'
_computing_publication_material   'ShelxTL97'

_refine_special_details
;
Refinement of F^2^ against ALL reflections.  The weighted R-factor wR 
and
goodness of fit S are based on F^2^, conventional R-factors R are based
on F, with F set to zero for negative F^2^. The threshold expression of
F^2^ > 2sigma(F^2^) is used only for calculating R-factors(gt) etc. and 
is
not relevant to the choice of reflections for refinement.  R-factors 
based
on F^2^ are statistically about twice as large as those based on F, and 
R-
factors based on ALL data will be even larger.
;

_refine_ls_structure_factor_coef  Fsqd
_refine_ls_matrix_type            full
_refine_ls_weighting_scheme       calc
_refine_ls_weighting_details
'calc w=1/[\s^2^(Fo^2^)+(0.0417P)^2^+1.2942P] where P=(Fo^2^+2Fc^2^)/3'
_atom_sites_solution_primary      direct
_atom_sites_solution_secondary    difmap
_atom_sites_solution_hydrogens    geom
_refine_ls_hydrogen_treatment     mixed
_refine_ls_extinction_method      'SHELXL'
_refine_ls_extinction_coef        0.068(4)
_refine_ls_extinction_expression
'Fc^*^=kFc[1+0.001xFc^2^\l^3^/sin(2\q)]^-1/4^'
_refine_ls_number_reflns          1115
_refine_ls_number_parameters      86
_refine_ls_number_restraints      0
_refine_ls_R_factor_all           0.0434
_refine_ls_R_factor_gt            0.0369
_refine_ls_wR_factor_ref          0.0957
_refine_ls_wR_factor_gt           0.0900
_refine_ls_goodness_of_fit_ref    1.120
_refine_ls_restrained_S_all       1.120
_refine_ls_shift/su_max           0.001
_refine_ls_shift/su_mean          0.000

loop_
_atom_site_label
_atom_site_type_symbol
_atom_site_fract_x
_atom_site_fract_y
_atom_site_fract_z
_atom_site_U_iso_or_equiv
_atom_site_adp_type
_atom_site_occupancy
_atom_site_symmetry_multiplicity
_atom_site_calc_flag
_atom_site_refinement_flags
_atom_site_disorder_assembly
_atom_site_disorder_group
S1 S 0.11413(3) 0.21838(8) 0.96135(5) 0.0283(2) Uani 1 1 d . . .
O1 O 0.01446(10) 0.1852(3) 0.94264(17) 0.0437(4) Uani 1 1 d . . .
O2 O 0.15028(11) 0.2232(3) 1.10530(15) 0.0444(4) Uani 1 1 d . . .
O3 O 0.12907(11) 0.4330(3) 0.89840(17) 0.0477(5) Uani 1 1 d . . .
O4 O 0.14878(11) 0.0270(3) 0.89800(17) 0.0471(5) Uani 1 1 d . . .
N1 N 0.30105(16) 0.7759(4) 0.8473(2) 0.0382(5) Uani 1 1 d . . .
N2 N 0.5000 0.2303(5) 0.7500 0.0333(6) Uani 1 2 d S . .
H1 H 0.322(4) 0.861(10) 0.897(6) 0.13(2) Uiso 1 1 d . . .
H2 H 0.246(3) 0.807(7) 0.849(4) 0.092(13) Uiso 1 1 d . . .
H3 H 0.317(3) 0.784(7) 0.788(6) 0.095(16) Uiso 1 1 d . . .
H4 H 0.305(3) 0.645(8) 0.879(4) 0.097(14) Uiso 1 1 d . . .
H5 H 0.466(3) 0.294(7) 0.772(5) 0.110(18) Uiso 1 1 d . . .
H6 H 0.474(3) 0.157(8) 0.693(4) 0.101(15) Uiso 1 1 d . . .
H1O H 0.0000 0.0000 1.0000 0.16(3) Uiso 1 2 d S . .

loop_
_atom_site_aniso_label
_atom_site_aniso_U_11
_atom_site_aniso_U_22
_atom_site_aniso_U_33
_atom_site_aniso_U_23
_atom_site_aniso_U_13
_atom_site_aniso_U_12
S1 0.0290(3) 0.0286(3) 0.0276(3) 0.00018(17) 0.00605(18) 0.00311(17)
O1 0.0249(8) 0.0563(11) 0.0491(9) -0.0013(8) 0.0054(6) 0.0021(6)
O2 0.0406(9) 0.0634(11) 0.0270(8) 0.0020(7) 0.0021(6) -0.0070(7)
O3 0.0495(9) 0.0364(9) 0.0554(10) 0.0173(7) 0.0062(7) 0.0017(7)
O4 0.0435(9) 0.0390(9) 0.0629(10) -0.0178(8) 0.0204(7) 0.0003(7)
N1 0.0458(12) 0.0345(11) 0.0354(11) 0.0005(8) 0.0110(9) 0.0073(8)
N2 0.0345(14) 0.0366(14) 0.0283(12) 0.000 0.0056(11) 0.000

_geom_special_details
;
All esds (except the esd in the dihedral angle between two l.s. planes)
are estimated using the full covariance matrix.  The cell esds are 
taken
into account individually in the estimation of esds in distances, 
angles
and torsion angles; correlations between esds in cell parameters are 
only
used when they are defined by crystal symmetry.  An approximate 
(isotropic)
treatment of cell esds is used for estimating esds involving l.s. 
planes.
;

loop_
_geom_bond_atom_site_label_1
_geom_bond_atom_site_label_2
_geom_bond_distance
_geom_bond_site_symmetry_2
_geom_bond_publ_flag
S1 O4 1.4456(15) . ?
S1 O3 1.4478(16) . ?
S1 O2 1.4521(16) . ?
S1 O1 1.5191(16) . ?
O1 H1O 1.2702(18) . ?
N1 H1 0.73(6) . ?
N1 H2 0.87(5) . ?
N1 H3 0.70(6) . ?
N1 H4 0.83(5) . ?
N2 H5 0.71(5) . ?
N2 H6 0.76(4) . ?

loop_
_geom_angle_atom_site_label_1
_geom_angle_atom_site_label_2
_geom_angle_atom_site_label_3
_geom_angle
_geom_angle_site_symmetry_1
_geom_angle_site_symmetry_3
_geom_angle_publ_flag
O4 S1 O3 111.65(11) . . ?
O4 S1 O2 111.19(11) . . ?
O3 S1 O2 111.32(10) . . ?
O4 S1 O1 107.49(10) . . ?
O3 S1 O1 107.65(10) . . ?
O2 S1 O1 107.30(10) . . ?
S1 O1 H1O 108.60(11) . . ?
H1 N1 H2 98(5) . . ?
H1 N1 H3 111(5) . . ?
H2 N1 H3 121(5) . . ?
H1 N1 H4 112(5) . . ?
H2 N1 H4 101(4) . . ?
H3 N1 H4 113(4) . . ?
H5 N2 H6 103(6) . . ?

_diffrn_measured_fraction_theta_max    0.960
_diffrn_reflns_theta_full              28.80
_diffrn_measured_fraction_theta_full   0.960
_refine_diff_density_max    0.484
_refine_diff_density_min   -0.514
_refine_diff_density_rms    0.069


data_PhaseIII

_audit_creation_method            'SHELXL-97'
_chemical_name_systematic
;
triammonium hydrogen disulphate
;
_chemical_name_common             ?
_chemical_melting_point           ?
_chemical_formula_moiety          (NH4)3H(SO4)2
_chemical_formula_sum
'H13 N3 O8 S2'
_chemical_formula_weight          247.25

loop_
_atom_type_symbol
_atom_type_description
_atom_type_scat_dispersion_real
_atom_type_scat_dispersion_imag
_atom_type_scat_source
'N'  'N'   0.0061   0.0033
'International Tables Vol C Tables 4.2.6.8 and 6.1.1.4'
'H'  'H'   0.0000   0.0000
'International Tables Vol C Tables 4.2.6.8 and 6.1.1.4'
'O'  'O'   0.0106   0.0060
'International Tables Vol C Tables 4.2.6.8 and 6.1.1.4'
'S'  'S'   0.1246   0.1234
'International Tables Vol C Tables 4.2.6.8 and 6.1.1.4'

_symmetry_cell_setting            ?
_symmetry_space_group_name_H-M    ?

loop_
_symmetry_equiv_pos_as_xyz
'x, y, z'
'-x+1/2, y, -z+1/2'
'-x, -y, -z'
'x-1/2, -y, z-1/2'

_cell_length_a                    10.044(2)
_cell_length_b                    5.8130(12)
_cell_length_c                    15.540(3)
_cell_angle_alpha                 90.00
_cell_angle_beta                  101.58(3)
_cell_angle_gamma                 90.00
_cell_volume                      888.8(3)
_cell_formula_units_Z             4
_cell_measurement_temperature     150(2)
__cell_measurement_reflns_used    5000
_cell_measurement_theta_min       4
_cell_measurement_theta_max       45

_exptl_crystal_description        ?
_exptl_crystal_colour             colourless
_exptl_crystal_size_max           0.7
_exptl_crystal_size_mid           0.7
_exptl_crystal_size_min           0.6
_exptl_crystal_density_meas       ?
_exptl_crystal_density_diffrn     1.848
_exptl_crystal_density_method     'not measured'
_exptl_crystal_F_000              520
_exptl_absorpt_coefficient_mu     0.626
_exptl_absorpt_correction_type    ?
_exptl_absorpt_correction_T_min   ?
_exptl_absorpt_correction_T_max   ?
_exptl_absorpt_process_details    ?

_exptl_special_details
;
?
;

_diffrn_ambient_temperature       293(2)
_diffrn_radiation_wavelength      0.71073
_diffrn_radiation_type            MoK\a
_diffrn_radiation_source          'fine-focus sealed tube'
_diffrn_radiation_monochromator   graphite
_diffrn_measurement_device_type   KM4CCD
_diffrn_measurement_method        omega scan
_diffrn_detector_area_resol_mean  1 frame
_diffrn_standards_number          13
_diffrn_standards_interval_count  50
_diffrn_standards_interval_time   65
_diffrn_standards_decay_%         2
_diffrn_reflns_number             15419
_diffrn_reflns_av_R_equivalents   0.0357
_diffrn_reflns_av_sigmaI/netI     0.0190
_diffrn_reflns_limit_h_min        -13
_diffrn_reflns_limit_h_max        13
_diffrn_reflns_limit_k_min        -7
_diffrn_reflns_limit_k_max        7
_diffrn_reflns_limit_l_min        -20
_diffrn_reflns_limit_l_max        20
_diffrn_reflns_theta_min          3.50
_diffrn_reflns_theta_max          28.78
_reflns_number_total              2220
_reflns_number_gt                 1870
_reflns_threshold_expression      >2sigma(I)

_computing_data_collection        'CrysAlisCCD'
_computing_cell_refinement        'CrysAlisRED'
_computing_data_reduction         'CrysAlisRED'
_computing_structure_solution     'SHELXS-97 (Sheldrick, 1990)'
_computing_structure_refinement   'SHELXL-97 (Sheldrick, 1997)'
_computing_molecular_graphics     'Diamond'
_computing_publication_material   'ShelxTL97'

_refine_special_details
;
Refinement of F^2^ against ALL reflections.  The weighted R-factor wR 
and
goodness of fit S are based on F^2^, conventional R-factors R are based
on F, with F set to zero for negative F^2^. The threshold expression of
F^2^ > 2sigma(F^2^) is used only for calculating R-factors(gt) etc. and 
is
not relevant to the choice of reflections for refinement.  R-factors 
based
on F^2^ are statistically about twice as large as those based on F, and 
R-
factors based on ALL data will be even larger.
;

_refine_ls_structure_factor_coef  Fsqd
_refine_ls_matrix_type            full
_refine_ls_weighting_scheme       calc
_refine_ls_weighting_details
'calc w=1/[\s^2^(Fo^2^)+(0.0538P)^2^+0.4896P] where P=(Fo^2^+2Fc^2^)/3'
_atom_sites_solution_primary      direct
_atom_sites_solution_secondary    difmap
_atom_sites_solution_hydrogens    geom
_refine_ls_hydrogen_treatment     mixed
_refine_ls_extinction_method      'SHELXL'
_refine_ls_extinction_coef        0.039(2)
_refine_ls_extinction_expression
'Fc^*^=kFc[1+0.001xFc^2^\l^3^/sin(2\q)]^-1/4^'
_refine_ls_number_reflns          2220
_refine_ls_number_parameters      172
_refine_ls_number_restraints      0
_refine_ls_R_factor_all           0.0426
_refine_ls_R_factor_gt            0.0347
_refine_ls_wR_factor_ref          0.0997
_refine_ls_wR_factor_gt           0.0935
_refine_ls_goodness_of_fit_ref    1.075
_refine_ls_restrained_S_all       1.075
_refine_ls_shift/su_max           0.001
_refine_ls_shift/su_mean          0.000

loop_
_atom_site_label
_atom_site_type_symbol
_atom_site_fract_x
_atom_site_fract_y
_atom_site_fract_z
_atom_site_U_iso_or_equiv
_atom_site_adp_type
_atom_site_occupancy
_atom_site_symmetry_multiplicity
_atom_site_calc_flag
_atom_site_refinement_flags
_atom_site_disorder_assembly
_atom_site_disorder_group
S1 S 0.53755(4) 0.03431(7) 0.63937(2) 0.01501(15) Uani 1 1 d . . .
O1 O 0.55291(13) 0.0706(2) 0.73685(8) 0.0263(3) Uani 1 1 d . . .
O2 O 0.39316(11) 0.0619(2) 0.59945(8) 0.0216(3) Uani 1 1 d . . .
O3 O 0.58366(12) -0.19825(19) 0.62504(8) 0.0224(3) Uani 1 1 d . . .
O4 O 0.62006(11) 0.2069(2) 0.60598(7) 0.0211(3) Uani 1 1 d . . .
S2 S 0.03941(4) 0.47070(7) 0.63395(2) 0.01544(15) Uani 1 1 d . . .
O5 O 0.06212(13) 0.4396(2) 0.73389(8) 0.0251(3) Uani 1 1 d . . .
O6 O -0.10573(12) 0.5075(2) 0.60209(8) 0.0206(3) Uani 1 1 d . . .
O7 O 0.11895(12) 0.6707(2) 0.61888(8) 0.0228(3) Uani 1 1 d . . .
O8 O 0.08534(12) 0.2605(2) 0.59789(7) 0.0212(3) Uani 1 1 d . . .
N1 N 0.35130(16) 0.5307(3) 0.54841(10) 0.0197(3) Uani 1 1 d . . .
N2 N 0.7500 0.0195(4) 0.2500 0.0192(4) Uani 1 2 d S . .
N3 N 0.84368(16) 0.9782(3) 0.55036(10) 0.0184(3) Uani 1 1 d . . .
N4 N 0.2500 0.4774(4) 0.2500 0.0174(4) Uani 1 2 d S . .
H1 H 0.417(2) 0.597(4) 0.5721(14) 0.027(6) Uiso 1 1 d . . .
H2 H 0.345(2) 0.560(4) 0.4926(17) 0.027(6) Uiso 1 1 d . . .
H3 H 0.286(2) 0.570(4) 0.5654(14) 0.025(5) Uiso 1 1 d . . .
H4 H 0.366(2) 0.388(4) 0.5566(14) 0.028(5) Uiso 1 1 d . . .
H5 H 0.725(4) -0.036(5) 0.281(2) 0.059(10) Uiso 1 1 d . . .
H6 H 0.809(3) 0.089(6) 0.277(2) 0.083(12) Uiso 1 1 d . . .
H7 H 0.859(2) 0.849(4) 0.5662(15) 0.031(6) Uiso 1 1 d . . .
H8 H 0.827(2) 0.967(4) 0.4954(18) 0.033(6) Uiso 1 1 d . . .
H9 H 0.784(3) 1.038(4) 0.5691(15) 0.033(6) Uiso 1 1 d . . .
H10 H 0.912(2) 1.061(4) 0.5616(14) 0.028(6) Uiso 1 1 d . . .
H11 H 0.224(4) 0.546(5) 0.282(2) 0.071(11) Uiso 1 1 d . . .
H12 H 0.312(3) 0.409(5) 0.2781(18) 0.049(8) Uiso 1 1 d . . .
H5O H 0.011(3) 0.284(6) 0.7463(19) 0.116(15) Uiso 1 1 d . . .

loop_
_atom_site_aniso_label
_atom_site_aniso_U_11
_atom_site_aniso_U_22
_atom_site_aniso_U_33
_atom_site_aniso_U_23
_atom_site_aniso_U_13
_atom_site_aniso_U_12
S1 0.0144(2) 0.0145(2) 0.0161(2) 0.00210(13) 0.00316(15) 0.00012(13)
O1 0.0321(7) 0.0329(7) 0.0135(6) 0.0008(5) 0.0038(5) 0.0011(5)
O2 0.0132(5) 0.0237(6) 0.0267(6) -0.0008(5) 0.0011(4) 0.0013(4)
O3 0.0237(6) 0.0152(6) 0.0269(6) 0.0017(4) 0.0018(5) 0.0044(5)
O4 0.0219(6) 0.0179(6) 0.0251(6) 0.0003(4) 0.0086(4) -0.0054(4)
S2 0.0148(2) 0.0155(2) 0.0162(2) -0.00223(13) 0.00340(15) 0.00001(13)
O5 0.0288(7) 0.0330(7) 0.0127(6) -0.0015(5) 0.0021(5) 0.0015(5)
O6 0.0152(6) 0.0238(6) 0.0228(6) 0.0015(4) 0.0037(4) 0.0011(4)
O7 0.0217(6) 0.0200(6) 0.0273(6) -0.0025(5) 0.0060(5) -0.0057(5)
O8 0.0247(6) 0.0172(6) 0.0233(6) -0.0019(4) 0.0089(4) 0.0035(4)
N1 0.0184(8) 0.0174(8) 0.0236(8) 0.0024(6) 0.0045(6) 0.0009(6)
N2 0.0172(10) 0.0200(10) 0.0204(11) 0.000 0.0035(9) 0.000
N3 0.0184(7) 0.0157(7) 0.0218(8) -0.0037(5) 0.0058(6) 0.0002(6)
N4 0.0147(10) 0.0180(10) 0.0186(10) 0.000 0.0013(8) 0.000

_geom_special_details
;
All esds (except the esd in the dihedral angle between two l.s. planes)
are estimated using the full covariance matrix.  The cell esds are 
taken
into account individually in the estimation of esds in distances, 
angles
and torsion angles; correlations between esds in cell parameters are 
only
used when they are defined by crystal symmetry.  An approximate 
(isotropic)
treatment of cell esds is used for estimating esds involving l.s. 
planes.
;

loop_
_geom_bond_atom_site_label_1
_geom_bond_atom_site_label_2
_geom_bond_distance
_geom_bond_site_symmetry_2
_geom_bond_publ_flag
S1 O3 1.4605(12) . ?
S1 O4 1.4613(11) . ?
S1 O2 1.4672(12) . ?
S1 O1 1.5064(12) . ?
S2 O7 1.4558(12) . ?
S2 O8 1.4570(11) . ?
S2 O6 1.4582(12) . ?
S2 O5 1.5344(13) . ?
O5 H5O 1.07(4) . ?
N1 H1 0.79(2) . ?
N1 H2 0.87(2) . ?
N1 H3 0.78(2) . ?
N1 H4 0.84(2) . ?
N2 H5 0.67(3) . ?
N2 H6 0.77(4) . ?
N3 H7 0.79(3) . ?
N3 H8 0.84(3) . ?
N3 H9 0.80(3) . ?
N3 H10 0.83(2) . ?
N4 H11 0.73(3) . ?
N4 H12 0.79(3) . ?

loop_
_geom_angle_atom_site_label_1
_geom_angle_atom_site_label_2
_geom_angle_atom_site_label_3
_geom_angle
_geom_angle_site_symmetry_1
_geom_angle_site_symmetry_3
_geom_angle_publ_flag
O3 S1 O4 111.20(7) . . ?
O3 S1 O2 110.70(7) . . ?
O4 S1 O2 110.96(7) . . ?
O3 S1 O1 108.15(7) . . ?
O4 S1 O1 108.06(7) . . ?
O2 S1 O1 107.63(8) . . ?
O7 S2 O8 112.41(7) . . ?
O7 S2 O6 111.82(7) . . ?
O8 S2 O6 111.38(7) . . ?
O7 S2 O5 106.38(7) . . ?
O8 S2 O5 107.23(7) . . ?
O6 S2 O5 107.23(8) . . ?
S2 O5 H5O 107.6(16) . . ?
H1 N1 H2 105(2) . . ?
H1 N1 H3 112(2) . . ?
H2 N1 H3 112(2) . . ?
H1 N1 H4 108(2) . . ?
H2 N1 H4 108.5(19) . . ?
H3 N1 H4 111(2) . . ?
H5 N2 H6 102(4) . . ?
H7 N3 H8 103(2) . . ?
H7 N3 H9 114(2) . . ?
H8 N3 H9 113(2) . . ?
H7 N3 H10 113(2) . . ?
H8 N3 H10 104(2) . . ?
H9 N3 H10 109(2) . . ?
H11 N4 H12 104(4) . . ?

_diffrn_measured_fraction_theta_max    0.956
_diffrn_reflns_theta_full              28.78
_diffrn_measured_fraction_theta_full   0.956
_refine_diff_density_max    0.377
_refine_diff_density_min   -0.649
_refine_diff_density_rms    0.078


data_PhaseIV

_audit_creation_method            'SHELXL-97'
_chemical_name_systematic
;
triammonium hydrogen disulphate
;
_chemical_name_common             ?
_chemical_melting_point           ?
_chemical_formula_moiety          (NH4)3H(SO4)2
_chemical_formula_sum
'H13 N3 O8 S2'
_chemical_formula_weight          247.25

loop_
_atom_type_symbol
_atom_type_description
_atom_type_scat_dispersion_real
_atom_type_scat_dispersion_imag
_atom_type_scat_source
'N'  'N'   0.0061   0.0033
'International Tables Vol C Tables 4.2.6.8 and 6.1.1.4'
'H'  'H'   0.0000   0.0000
'International Tables Vol C Tables 4.2.6.8 and 6.1.1.4'
'O'  'O'   0.0106   0.0060
'International Tables Vol C Tables 4.2.6.8 and 6.1.1.4'
'S'  'S'   0.1246   0.1234
'International Tables Vol C Tables 4.2.6.8 and 6.1.1.4'

_symmetry_cell_setting            ?
_symmetry_space_group_name_H-M    ?

loop_
_symmetry_equiv_pos_as_xyz
'x, y, z'
'-x+1/2, y, -z+1/2'
'-x, -y, -z'
'x-1/2, -y, z-1/2'

_cell_length_a                    10.048(2)
_cell_length_b                    5.8060(12)
_cell_length_c                    15.538(3)
_cell_angle_alpha                 90.00
_cell_angle_beta                  101.55(3)
_cell_angle_gamma                 90.00
_cell_volume                      888.1(3)
_cell_formula_units_Z             4
_cell_measurement_temperature     136(2)
_cell_measurement_reflns_used     5000
_cell_measurement_theta_min       4
_cell_measurement_theta_max       45

_exptl_crystal_description        ?
_exptl_crystal_colour             colourless
_exptl_crystal_size_max           0.7
_exptl_crystal_size_mid           0.7
_exptl_crystal_size_min           0.6
_exptl_crystal_density_meas       ?
_exptl_crystal_density_diffrn     1.849
_exptl_crystal_density_method     'not measured'
_exptl_crystal_F_000              520
_exptl_absorpt_coefficient_mu     0.626
_exptl_absorpt_correction_type    ?
_exptl_absorpt_correction_T_min   ?
_exptl_absorpt_correction_T_max   ?
_exptl_absorpt_process_details    ?

_exptl_special_details
;
?
;

_diffrn_ambient_temperature       293(2)
_diffrn_radiation_wavelength      0.71073
_diffrn_radiation_type            MoK\a
_diffrn_radiation_source          'fine-focus sealed tube'
_diffrn_radiation_monochromator   graphite
_diffrn_measurement_device_type   KM4CCD
_diffrn_measurement_method        omega scan
_diffrn_detector_area_resol_mean  1 frame
_diffrn_standards_number          13
_diffrn_standards_interval_count  50
_diffrn_standards_interval_time   65
_diffrn_standards_decay_%         2
_diffrn_reflns_number             15480
_diffrn_reflns_av_R_equivalents   0.0376
_diffrn_reflns_av_sigmaI/netI     0.0215
_diffrn_reflns_limit_h_min        -13
_diffrn_reflns_limit_h_max        13
_diffrn_reflns_limit_k_min        -7
_diffrn_reflns_limit_k_max        7
_diffrn_reflns_limit_l_min        -20
_diffrn_reflns_limit_l_max        20
_diffrn_reflns_theta_min          3.51
_diffrn_reflns_theta_max          28.77
_reflns_number_total              2228
_reflns_number_gt                 1791
_reflns_threshold_expression      >2sigma(I)

_computing_data_collection        'CrysAlisCCD'
_computing_cell_refinement        'CrysAlisRED'
_computing_data_reduction         'CrysAlisRED'
_computing_structure_solution     'SHELXS-97 (Sheldrick, 1990)'
_computing_structure_refinement   'SHELXL-97 (Sheldrick, 1997)'
_computing_molecular_graphics     'Diamond'
_computing_publication_material   'ShelxTL97'

_refine_special_details
;
Refinement of F^2^ against ALL reflections.  The weighted R-factor wR 
and
goodness of fit S are based on F^2^, conventional R-factors R are based
on F, with F set to zero for negative F^2^. The threshold expression of
F^2^ > 2sigma(F^2^) is used only for calculating R-factors(gt) etc. and 
is
not relevant to the choice of reflections for refinement.  R-factors 
based
on F^2^ are statistically about twice as large as those based on F, and 
R-
factors based on ALL data will be even larger.
;

_refine_ls_structure_factor_coef  Fsqd
_refine_ls_matrix_type            full
_refine_ls_weighting_scheme       calc
_refine_ls_weighting_details
'calc w=1/[\s^2^(Fo^2^)+(0.0681P)^2^+0.2590P] where P=(Fo^2^+2Fc^2^)/3'
_atom_sites_solution_primary      direct
_atom_sites_solution_secondary    difmap
_atom_sites_solution_hydrogens    geom
_refine_ls_hydrogen_treatment     mixed
_refine_ls_extinction_method      SHELXL
_refine_ls_extinction_coef        0.025(3)
_refine_ls_extinction_expression
'Fc^*^=kFc[1+0.001xFc^2^\l^3^/sin(2\q)]^-1/4^'
_refine_ls_number_reflns          2228
_refine_ls_number_parameters      172
_refine_ls_number_restraints      0
_refine_ls_R_factor_all           0.0510
_refine_ls_R_factor_gt            0.0399
_refine_ls_wR_factor_ref          0.1209
_refine_ls_wR_factor_gt           0.1113
_refine_ls_goodness_of_fit_ref    1.139
_refine_ls_restrained_S_all       1.139
_refine_ls_shift/su_max           0.001
_refine_ls_shift/su_mean          0.000

loop_
_atom_site_label
_atom_site_type_symbol
_atom_site_fract_x
_atom_site_fract_y
_atom_site_fract_z
_atom_site_U_iso_or_equiv
_atom_site_adp_type
_atom_site_occupancy
_atom_site_symmetry_multiplicity
_atom_site_calc_flag
_atom_site_refinement_flags
_atom_site_disorder_assembly
_atom_site_disorder_group
S1 S 0.53782(4) 0.46622(8) 0.63925(3) 0.01534(18) Uani 1 1 d . . .
O1 O 0.55378(15) 0.4300(3) 0.73682(9) 0.0269(4) Uani 1 1 d . . .
O2 O 0.39332(13) 0.4390(2) 0.59972(9) 0.0219(3) Uani 1 1 d . . .
O3 O 0.58398(13) 0.6989(2) 0.62474(9) 0.0228(3) Uani 1 1 d . . .
O4 O 0.61992(13) 0.2934(2) 0.60565(8) 0.0215(3) Uani 1 1 d . . .
S2 S 0.46056(4) 0.02922(8) 0.86578(3) 0.01557(18) Uani 1 1 d . . .
O5 O 0.43798(14) 0.0613(2) 0.76602(9) 0.0244(3) Uani 1 1 d . . .
O6 O 0.60587(13) -0.0077(2) 0.89772(9) 0.0207(3) Uani 1 1 d . . .
O7 O 0.38098(13) -0.1710(2) 0.88092(9) 0.0228(3) Uani 1 1 d . . .
O8 O 0.41462(13) 0.2395(2) 0.90214(8) 0.0212(3) Uani 1 1 d . . .
N1 N 0.35093(18) 0.9701(3) 0.54857(12) 0.0194(4) Uani 1 1 d . . .
N2 N 0.2500 0.5187(5) 0.7500 0.0187(5) Uani 1 2 d S . .
N3 N 0.15622(18) 0.4786(3) 0.44995(12) 0.0184(4) Uani 1 1 d . . .
N4 N 0.2500 0.0220(5) 0.2500 0.0174(5) Uani 1 2 d S . .
H1 H 0.418(2) 0.905(4) 0.5714(15) 0.027(6) Uiso 1 1 d . . .
H2 H 0.344(3) 0.941(4) 0.4944(19) 0.029(6) Uiso 1 1 d . . .
H3 H 0.283(2) 0.928(4) 0.5658(15) 0.021(6) Uiso 1 1 d . . .
H4 H 0.364(2) 1.111(5) 0.5563(16) 0.035(7) Uiso 1 1 d . . .
H5 H 0.280(3) 0.462(5) 0.720(2) 0.049(10) Uiso 1 1 d . . .
H6 H 0.191(3) 0.591(6) 0.723(2) 0.073(12) Uiso 1 1 d . . .
H7 H 0.142(2) 0.350(5) 0.4337(16) 0.032(7) Uiso 1 1 d . . .
H8 H 0.170(3) 0.472(4) 0.504(2) 0.032(7) Uiso 1 1 d . . .
H9 H 0.218(3) 0.537(4) 0.4318(17) 0.036(7) Uiso 1 1 d . . .
H10 H 0.086(3) 0.556(4) 0.4369(16) 0.030(6) Uiso 1 1 d . . .
H11 H 0.225(4) -0.041(5) 0.281(2) 0.056(10) Uiso 1 1 d . . .
H12 H 0.315(3) 0.090(5) 0.2775(19) 0.046(8) Uiso 1 1 d . . .
H5O H 0.493(3) 0.231(6) 0.7514(19) 0.126(18) Uiso 1 1 d . . .

loop_
_atom_site_aniso_label
_atom_site_aniso_U_11
_atom_site_aniso_U_22
_atom_site_aniso_U_33
_atom_site_aniso_U_23
_atom_site_aniso_U_13
_atom_site_aniso_U_12
S1 0.0152(3) 0.0147(3) 0.0164(3) -0.00213(14) 0.00374(17) -0.00027(14)
O1 0.0344(8) 0.0323(8) 0.0137(7) -0.0011(5) 0.0038(5) -0.0025(6)
O2 0.0130(6) 0.0250(7) 0.0267(7) 0.0014(5) 0.0018(5) -0.0014(5)
O3 0.0256(7) 0.0144(6) 0.0273(7) -0.0017(5) 0.0024(5) -0.0047(5)
O4 0.0224(6) 0.0178(6) 0.0259(7) 0.0006(5) 0.0088(5) 0.0055(5)
S2 0.0151(3) 0.0156(3) 0.0163(3) -0.00223(15) 0.00376(18) -0.00047(14)
O5 0.0274(7) 0.0316(8) 0.0133(6) -0.0010(5) 0.0024(5) 0.0015(6)
O6 0.0152(6) 0.0246(7) 0.0222(7) 0.0017(5) 0.0040(5) 0.0010(5)
O7 0.0223(6) 0.0202(7) 0.0264(7) -0.0027(5) 0.0056(5) -0.0060(5)
O8 0.0248(6) 0.0174(6) 0.0231(7) -0.0014(5) 0.0089(5) 0.0040(5)
N1 0.0179(9) 0.0169(9) 0.0235(9) -0.0030(6) 0.0045(7) -0.0010(6)
N2 0.0170(12) 0.0192(12) 0.0199(12) 0.000 0.0038(10) 0.000
N3 0.0188(9) 0.0164(9) 0.0206(9) 0.0034(6) 0.0055(7) 0.0000(6)
N4 0.0146(11) 0.0187(12) 0.0180(12) 0.000 0.0009(10) 0.000

_geom_special_details
;
All esds (except the esd in the dihedral angle between two l.s. planes)
are estimated using the full covariance matrix.  The cell esds are 
taken
into account individually in the estimation of esds in distances, 
angles
and torsion angles; correlations between esds in cell parameters are 
only
used when they are defined by crystal symmetry.  An approximate 
(isotropic)
treatment of cell esds is used for estimating esds involving l.s. 
planes.
;

loop_
_geom_bond_atom_site_label_1
_geom_bond_atom_site_label_2
_geom_bond_distance
_geom_bond_site_symmetry_2
_geom_bond_publ_flag
S1 O3 1.4603(13) . ?
S1 O4 1.4604(12) . ?
S1 O2 1.4674(14) . ?
S1 O1 1.5070(14) . ?
O1 H5O 1.35(4) . ?
S2 O7 1.4564(13) . ?
S2 O8 1.4586(13) . ?
S2 O6 1.4608(14) . ?
S2 O5 1.5324(14) . ?
O5 H5O 1.17(4) . ?
N1 H1 0.79(2) . ?
N1 H2 0.85(3) . ?
N1 H3 0.82(2) . ?
N1 H4 0.83(3) . ?
N2 H5 0.69(3) . ?
N2 H6 0.78(3) . ?
N3 H7 0.79(3) . ?
N3 H8 0.83(3) . ?
N3 H9 0.80(3) . ?
N3 H10 0.82(3) . ?
N4 H11 0.70(3) . ?
N4 H12 0.81(3) . ?

loop_
_geom_angle_atom_site_label_1
_geom_angle_atom_site_label_2
_geom_angle_atom_site_label_3
_geom_angle
_geom_angle_site_symmetry_1
_geom_angle_site_symmetry_3
_geom_angle_publ_flag
O3 S1 O4 111.16(7) . . ?
O3 S1 O2 110.68(7) . . ?
O4 S1 O2 111.03(8) . . ?
O3 S1 O1 108.14(8) . . ?
O4 S1 O1 108.04(8) . . ?
O2 S1 O1 107.65(9) . . ?
S1 O1 H5O 109.2(13) . . ?
O7 S2 O8 112.27(8) . . ?
O7 S2 O6 111.83(8) . . ?
O8 S2 O6 111.32(8) . . ?
O7 S2 O5 106.59(8) . . ?
O8 S2 O5 107.20(8) . . ?
O6 S2 O5 107.27(8) . . ?
S2 O5 H5O 108.5(14) . . ?
H1 N1 H2 104(2) . . ?
H1 N1 H3 113(2) . . ?
H2 N1 H3 111(2) . . ?
H1 N1 H4 108(2) . . ?
H2 N1 H4 108(2) . . ?
H3 N1 H4 111(2) . . ?
H5 N2 H6 106(4) . . ?
H7 N3 H8 105(2) . . ?
H7 N3 H9 113(2) . . ?
H8 N3 H9 113(3) . . ?
H7 N3 H10 110(2) . . ?
H8 N3 H10 104(2) . . ?
H9 N3 H10 111(2) . . ?
H11 N4 H12 105(4) . . ?

_diffrn_measured_fraction_theta_max    0.961
_diffrn_reflns_theta_full              28.77
_diffrn_measured_fraction_theta_full   0.961
_refine_diff_density_max    0.407
_refine_diff_density_min   -0.706
_refine_diff_density_rms    0.092


data_PhaseV

_audit_creation_method            'SHELXL-97'
_chemical_name_systematic
;
triammonium hydrogen disulphate
;
_chemical_name_common             ?
_chemical_melting_point           ?
_chemical_formula_moiety          (NH4)3H(SO4)2
_chemical_formula_sum
'H26 N6 O16 S4'
_chemical_formula_weight          494.51

loop_
_atom_type_symbol
_atom_type_description
_atom_type_scat_dispersion_real
_atom_type_scat_dispersion_imag
_atom_type_scat_source
'N'  'N'   0.0061   0.0033
'International Tables Vol C Tables 4.2.6.8 and 6.1.1.4'
'H'  'H'   0.0000   0.0000
'International Tables Vol C Tables 4.2.6.8 and 6.1.1.4'
'O'  'O'   0.0106   0.0060
'International Tables Vol C Tables 4.2.6.8 and 6.1.1.4'
'S'  'S'   0.1246   0.1234
'International Tables Vol C Tables 4.2.6.8 and 6.1.1.4'

_symmetry_cell_setting            ?
_symmetry_space_group_name_H-M    ?

loop_
_symmetry_equiv_pos_as_xyz
'x, y, z'
'-x, -y, -z'

_cell_length_a                    8.2670(17)
_cell_length_b                    10.081(2)
_cell_length_c                    11.585(2)
_cell_angle_alpha                 90.46(3)
_cell_angle_beta                  110.04(3)
_cell_angle_gamma                 100.62(3)
_cell_volume                      888.8(3)
_cell_formula_units_Z             2
_cell_measurement_temperature     120(2)
_cell_measurement_reflns_used     5000
_cell_measurement_theta_min       4
_cell_measurement_theta_max       45

_exptl_crystal_description        ?
_exptl_crystal_colour             colourless
_exptl_crystal_size_max           0.7
_exptl_crystal_size_mid           0.7
_exptl_crystal_size_min           0.6
_exptl_crystal_density_meas       ?
_exptl_crystal_density_diffrn     1.848
_exptl_crystal_density_method     'not measured'
_exptl_crystal_F_000              520
_exptl_absorpt_coefficient_mu     0.626
_exptl_absorpt_correction_type    ?
_exptl_absorpt_correction_T_min   ?
_exptl_absorpt_correction_T_max   ?
_exptl_absorpt_process_details    ?

_exptl_special_details
;
?
;

_diffrn_ambient_temperature       293(2)
_diffrn_radiation_wavelength      0.71073
_diffrn_radiation_type            MoK\a
_diffrn_radiation_source          'fine-focus sealed tube'
_diffrn_radiation_monochromator   graphite
_diffrn_measurement_device_type   KM4CCD
_diffrn_measurement_method        omega scan
_diffrn_detector_area_resol_mean  1 frame
_diffrn_standards_number          13
_diffrn_standards_interval_count  50
_diffrn_standards_interval_time   65
_diffrn_standards_decay_%         2
_diffrn_reflns_number             16194
_diffrn_reflns_av_R_equivalents   0.0324
_diffrn_reflns_av_sigmaI/netI     0.0227
_diffrn_reflns_limit_h_min        -11
_diffrn_reflns_limit_h_max        11
_diffrn_reflns_limit_k_min        -13
_diffrn_reflns_limit_k_max        13
_diffrn_reflns_limit_l_min        -15
_diffrn_reflns_limit_l_max        15
_diffrn_reflns_theta_min          3.13
_diffrn_reflns_theta_max          28.77
_reflns_number_total              4332
_reflns_number_gt                 3279
_reflns_threshold_expression      >2sigma(I)

_computing_data_collection        'CrysAlisCCD'
_computing_cell_refinement        'CrysAlisRED'
_computing_data_reduction         'CrysAlisRED'
_computing_structure_solution     'SHELXS-97 (Sheldrick, 1990)'
_computing_structure_refinement   'SHELXL-97 (Sheldrick, 1997)'
_computing_molecular_graphics     'Diamond'
_computing_publication_material   'ShelxTL97'

_refine_special_details
;
Refinement of F^2^ against ALL reflections.  The weighted R-factor wR 
and
goodness of fit S are based on F^2^, conventional R-factors R are based
on F, with F set to zero for negative F^2^. The threshold expression of
F^2^ > 2sigma(F^2^) is used only for calculating R-factors(gt) etc. and 
is
not relevant to the choice of reflections for refinement.  R-factors 
based
on F^2^ are statistically about twice as large as those based on F, and 
R-
factors based on ALL data will be even larger.
;

_refine_ls_structure_factor_coef  Fsqd
_refine_ls_matrix_type            full
_refine_ls_weighting_scheme       calc
_refine_ls_weighting_details
'calc w=1/[\s^2^(Fo^2^)+(0.0521P)^2^+1.0120P] where P=(Fo^2^+2Fc^2^)/3'
_atom_sites_solution_primary      direct
_atom_sites_solution_secondary    difmap
_atom_sites_solution_hydrogens    geom
_refine_ls_hydrogen_treatment     mixed
_refine_ls_extinction_method      SHELXL
_refine_ls_extinction_coef        0.0236(18)
_refine_ls_extinction_expression
'Fc^*^=kFc[1+0.001xFc^2^\l^3^/sin(2\q)]^-1/4^'
_refine_ls_number_reflns          4332
_refine_ls_number_parameters      340
_refine_ls_number_restraints      0
_refine_ls_R_factor_all           0.0512
_refine_ls_R_factor_gt            0.0405
_refine_ls_wR_factor_ref          0.1269
_refine_ls_wR_factor_gt           0.1196
_refine_ls_goodness_of_fit_ref    1.155
_refine_ls_restrained_S_all       1.155
_refine_ls_shift/su_max           0.000
_refine_ls_shift/su_mean          0.000

loop_
_atom_site_label
_atom_site_type_symbol
_atom_site_fract_x
_atom_site_fract_y
_atom_site_fract_z
_atom_site_U_iso_or_equiv
_atom_site_adp_type
_atom_site_occupancy
_atom_site_symmetry_multiplicity
_atom_site_calc_flag
_atom_site_refinement_flags
_atom_site_disorder_assembly
_atom_site_disorder_group
S1 S 0.71984(7) 0.45502(5) 0.41258(5) 0.01289(16) Uani 1 1 d . . .
O1 O 0.5259(2) 0.43334(16) 0.34211(16) 0.0206(4) Uani 1 1 d . . .
O2 O 0.7923(2) 0.60106(15) 0.42045(15) 0.0175(3) Uani 1 1 d . . .
O3 O 0.7469(2) 0.40813(16) 0.53584(15) 0.0199(4) Uani 1 1 d . . .
O4 O 0.7981(2) 0.37876(16) 0.34543(15) 0.0196(4) Uani 1 1 d . . .
S2 S 0.26978(7) 0.53473(5) 0.08043(5) 0.01290(16) Uani 1 1 d . . .
O5 O 0.4689(2) 0.54733(17) 0.14394(16) 0.0208(4) Uani 1 1 d . . .
O6 O 0.1898(2) 0.39216(15) 0.07609(15) 0.0188(3) Uani 1 1 d . . .
O7 O 0.2437(2) 0.58060(17) -0.04213(15) 0.0215(4) Uani 1 1 d . . .
O8 O 0.2130(2) 0.62012(17) 0.15446(14) 0.0195(4) Uani 1 1 d . . .
S21 S 0.27014(7) 0.03545(5) 0.30387(5) 0.01285(16) Uani 1 1 d . . .
O21 O 0.4719(2) 0.05789(17) 0.33771(16) 0.0208(4) Uani 1 1 d . . .
O22 O 0.2072(2) -0.10950(15) 0.30397(15) 0.0186(3) Uani 1 1 d . . .
O23 O 0.2426(2) 0.11301(16) 0.39894(14) 0.0195(4) Uani 1 1 d . . .
O24 O 0.2001(2) 0.08501(17) 0.18246(14) 0.0199(4) Uani 1 1 d . . .
S22 S 0.72566(7) 0.95681(5) 0.19845(5) 0.01291(16) Uani 1 1 d . . .
O25 O 0.5315(2) 0.93412(16) 0.16990(15) 0.0195(4) Uani 1 1 d . . .
O26 O 0.7899(2) 1.10207(15) 0.19274(15) 0.0188(3) Uani 1 1 d . . .
O27 O 0.7614(2) 0.87637(17) 0.10740(15) 0.0204(4) Uani 1 1 d . . .
O28 O 0.8074(2) 0.91563(17) 0.32312(15) 0.0202(4) Uani 1 1 d . . .
N1 N 0.1004(3) 0.8473(2) 0.01239(19) 0.0165(4) Uani 1 1 d . . .
N2 N 0.5069(3) 0.7451(2) 0.3831(2) 0.0159(4) Uani 1 1 d . . .
N3 N 0.1073(3) 0.3505(2) 0.2942(2) 0.0176(4) Uani 1 1 d . . .
N4 N 0.5030(3) 0.2433(2) 0.11237(19) 0.0159(4) Uani 1 1 d . . .
N21 N 0.9078(3) 0.6527(2) 0.21753(19) 0.0157(4) Uani 1 1 d . . .
N23 N 0.9033(3) 0.1544(2) 0.48603(19) 0.0159(4) Uani 1 1 d . . .
H1 H 0.134(4) 0.873(3) -0.050(3) 0.032(8) Uiso 1 1 d . . .
H2 H -0.010(5) 0.826(4) -0.022(3) 0.045(10) Uiso 1 1 d . . .
H3 H 0.148(5) 0.799(4) 0.053(4) 0.043(11) Uiso 1 1 d . . .
H4 H 0.133(4) 0.922(4) 0.063(3) 0.035(9) Uiso 1 1 d . . .
H5A H 0.581(5) 0.705(4) 0.387(3) 0.043(10) Uiso 1 1 d . . .
H5B H 0.465(5) 0.765(4) 0.315(4) 0.057(12) Uiso 1 1 d . . .
H6A H 0.556(4) 0.826(3) 0.426(3) 0.020(7) Uiso 1 1 d . . .
H6B H 0.441(4) 0.697(3) 0.412(3) 0.018(7) Uiso 1 1 d . . .
H7 H 0.163(4) 0.419(3) 0.344(3) 0.032(8) Uiso 1 1 d . . .
H8 H 0.001(5) 0.339(4) 0.284(3) 0.042(10) Uiso 1 1 d . . .
H9 H 0.144(4) 0.287(3) 0.326(3) 0.027(8) Uiso 1 1 d . . .
H10 H 0.116(5) 0.375(4) 0.221(4) 0.043(10) Uiso 1 1 d . . .
H11A H 0.462(5) 0.253(3) 0.166(3) 0.042(10) Uiso 1 1 d . . .
H11B H 0.579(5) 0.198(4) 0.141(3) 0.046(10) Uiso 1 1 d . . .
H12A H 0.427(4) 0.188(3) 0.056(3) 0.028(8) Uiso 1 1 d . . .
H12B H 0.547(4) 0.313(3) 0.092(3) 0.024(8) Uiso 1 1 d . . .
H21 H 0.855(4) 0.585(3) 0.167(3) 0.017(7) Uiso 1 1 d . . .
H22 H 1.013(5) 0.665(3) 0.233(3) 0.033(9) Uiso 1 1 d . . .
H23 H 0.868(4) 0.718(4) 0.184(3) 0.033(9) Uiso 1 1 d . . .
H24 H 0.889(4) 0.625(3) 0.288(3) 0.027(8) Uiso 1 1 d . . .
H27 H 0.860(5) 0.130(4) 0.539(4) 0.042(10) Uiso 1 1 d . . .
H28 H 1.013(5) 0.167(3) 0.527(3) 0.036(9) Uiso 1 1 d . . .
H29 H 0.868(5) 0.213(4) 0.441(4) 0.051(11) Uiso 1 1 d . . .
H30 H 0.868(4) 0.081(3) 0.432(3) 0.033(8) Uiso 1 1 d . . .
H5O H 0.493(4) 0.497(3) 0.227(3) 0.062(12) Uiso 1 1 d . . .
H21O H 0.502(6) 0.007(5) 0.269(5) 0.13(2) Uiso 1 1 d . . .

loop_
_atom_site_aniso_label
_atom_site_aniso_U_11
_atom_site_aniso_U_22
_atom_site_aniso_U_33
_atom_site_aniso_U_23
_atom_site_aniso_U_13
_atom_site_aniso_U_12
S1 0.0134(3) 0.0123(3) 0.0145(3) 0.00247(19) 0.0063(2) 0.00354(19)
O1 0.0115(7) 0.0218(8) 0.0258(9) 0.0039(7) 0.0039(6) 0.0020(6)
O2 0.0191(8) 0.0114(7) 0.0219(8) 0.0025(6) 0.0075(6) 0.0018(6)
O3 0.0221(8) 0.0225(8) 0.0153(8) 0.0047(6) 0.0087(7) 0.0003(6)
O4 0.0210(8) 0.0231(8) 0.0165(8) -0.0010(6) 0.0080(6) 0.0062(6)
S2 0.0133(3) 0.0122(3) 0.0141(3) 0.00066(19) 0.0060(2) 0.00222(19)
O5 0.0111(7) 0.0245(8) 0.0258(9) 0.0010(7) 0.0060(7) 0.0020(6)
O6 0.0211(8) 0.0118(7) 0.0202(8) 0.0003(6) 0.0046(6) -0.0001(6)
O7 0.0226(8) 0.0260(9) 0.0153(8) 0.0043(6) 0.0082(7) 0.0003(7)
O8 0.0209(8) 0.0240(8) 0.0146(8) -0.0027(6) 0.0060(6) 0.0077(7)
S21 0.0131(3) 0.0121(3) 0.0127(3) 0.00118(19) 0.0037(2) 0.00268(19)
O21 0.0116(7) 0.0245(8) 0.0231(9) 0.0003(7) 0.0033(6) 0.0014(6)
O22 0.0202(8) 0.0117(7) 0.0243(8) 0.0008(6) 0.0091(7) 0.0020(6)
O23 0.0223(8) 0.0211(8) 0.0153(8) -0.0024(6) 0.0070(6) 0.0043(6)
O24 0.0203(8) 0.0255(9) 0.0147(8) 0.0067(6) 0.0056(6) 0.0073(7)
S22 0.0129(3) 0.0130(3) 0.0127(3) 0.00082(19) 0.0035(2) 0.00397(19)
O25 0.0119(7) 0.0225(8) 0.0224(8) -0.0006(6) 0.0039(6) 0.0032(6)
O26 0.0198(8) 0.0129(7) 0.0245(8) 0.0027(6) 0.0088(7) 0.0033(6)
O27 0.0212(8) 0.0238(8) 0.0164(8) -0.0043(6) 0.0062(6) 0.0055(7)
O28 0.0193(8) 0.0261(9) 0.0166(8) 0.0079(7) 0.0058(6) 0.0087(7)
N1 0.0180(10) 0.0163(10) 0.0140(9) 0.0009(8) 0.0039(8) 0.0034(8)
N2 0.0161(10) 0.0139(9) 0.0173(10) 0.0016(8) 0.0054(8) 0.0028(8)
N3 0.0212(11) 0.0157(10) 0.0195(10) 0.0028(8) 0.0104(8) 0.0055(8)
N4 0.0163(10) 0.0140(9) 0.0165(10) 0.0007(8) 0.0053(8) 0.0021(8)
N21 0.0179(10) 0.0141(9) 0.0178(10) 0.0010(8) 0.0092(8) 0.0039(8)
N23 0.0185(10) 0.0142(9) 0.0144(9) 0.0024(8) 0.0043(8) 0.0042(8)

_geom_special_details
;
All esds (except the esd in the dihedral angle between two l.s. planes)
are estimated using the full covariance matrix.  The cell esds are 
taken
into account individually in the estimation of esds in distances, 
angles
and torsion angles; correlations between esds in cell parameters are 
only
used when they are defined by crystal symmetry.  An approximate 
(isotropic)
treatment of cell esds is used for estimating esds involving l.s. 
planes.
;

loop_
_geom_bond_atom_site_label_1
_geom_bond_atom_site_label_2
_geom_bond_distance
_geom_bond_site_symmetry_2
_geom_bond_publ_flag
S1 O4 1.4605(17) . ?
S1 O3 1.4640(16) . ?
S1 O2 1.4731(16) . ?
S1 O1 1.5019(17) . ?
O1 H5O 1.44(4) . ?
S2 O8 1.4524(16) . ?
S2 O7 1.4538(17) . ?
S2 O6 1.4600(16) . ?
S2 O5 1.5360(17) . ?
O5 H5O 1.07(4) . ?
S21 O23 1.4492(16) . ?
S21 O24 1.4570(16) . ?
S21 O22 1.4581(16) . ?
S21 O21 1.5485(17) . ?
O21 H21O 1.06(5) . ?
S22 O27 1.4650(17) . ?
S22 O28 1.4693(17) . ?
S22 O26 1.4730(16) . ?
S22 O25 1.4959(17) . ?
N1 H1 0.88(4) . ?
N1 H2 0.84(4) . ?
N1 H3 0.75(4) . ?
N1 H4 0.89(4) . ?
N2 H5A 0.78(4) . ?
N2 H5B 0.79(4) . ?
N2 H6A 0.90(3) . ?
N2 H6B 0.82(3) . ?
N3 H7 0.85(4) . ?
N3 H8 0.83(4) . ?
N3 H9 0.79(3) . ?
N3 H10 0.91(4) . ?
N4 H11A 0.82(4) . ?
N4 H11B 0.82(4) . ?
N4 H12A 0.85(3) . ?
N4 H12B 0.81(3) . ?
N21 H21 0.84(3) . ?
N21 H22 0.81(4) . ?
N21 H23 0.83(4) . ?
N21 H24 0.92(3) . ?
N23 H27 0.83(4) . ?
N23 H28 0.85(4) . ?
N23 H29 0.82(4) . ?
N23 H30 0.90(4) . ?

loop_
_geom_angle_atom_site_label_1
_geom_angle_atom_site_label_2
_geom_angle_atom_site_label_3
_geom_angle
_geom_angle_site_symmetry_1
_geom_angle_site_symmetry_3
_geom_angle_publ_flag
O4 S1 O3 110.97(10) . . ?
O4 S1 O2 110.60(10) . . ?
O3 S1 O2 110.54(10) . . ?
O4 S1 O1 108.28(10) . . ?
O3 S1 O1 108.72(10) . . ?
O2 S1 O1 107.62(10) . . ?
S1 O1 H5O 110.5(13) . . ?
O8 S2 O7 112.34(10) . . ?
O8 S2 O6 111.95(10) . . ?
O7 S2 O6 111.94(10) . . ?
O8 S2 O5 107.04(10) . . ?
O7 S2 O5 106.18(10) . . ?
O6 S2 O5 106.94(10) . . ?
S2 O5 H5O 108.7(18) . . ?
O23 S21 O24 112.52(10) . . ?
O23 S21 O22 112.24(10) . . ?
O24 S21 O22 112.28(10) . . ?
O23 S21 O21 105.66(10) . . ?
O24 S21 O21 106.77(10) . . ?
O22 S21 O21 106.81(10) . . ?
S21 O21 H21O 110(3) . . ?
O27 S22 O28 110.67(10) . . ?
O27 S22 O26 110.36(10) . . ?
O28 S22 O26 110.31(10) . . ?
O27 S22 O25 109.14(10) . . ?
O28 S22 O25 108.26(10) . . ?
O26 S22 O25 108.03(10) . . ?
H1 N1 H2 102(3) . . ?
H1 N1 H3 117(4) . . ?
H2 N1 H3 119(4) . . ?
H1 N1 H4 104(3) . . ?
H2 N1 H4 112(3) . . ?
H3 N1 H4 102(3) . . ?
H5A N2 H5B 110(4) . . ?
H5A N2 H6A 109(3) . . ?
H5B N2 H6A 103(3) . . ?
H5A N2 H6B 105(3) . . ?
H5B N2 H6B 117(3) . . ?
H6A N2 H6B 113(3) . . ?
H7 N3 H8 109(3) . . ?
H7 N3 H9 107(3) . . ?
H8 N3 H9 108(3) . . ?
H7 N3 H10 104(3) . . ?
H8 N3 H10 106(3) . . ?
H9 N3 H10 122(3) . . ?
H11A N4 H11B 106(3) . . ?
H11A N4 H12A 107(3) . . ?
H11B N4 H12A 101(3) . . ?
H11A N4 H12B 115(3) . . ?
H11B N4 H12B 109(3) . . ?
H12A N4 H12B 118(3) . . ?
H21 N21 H22 111(3) . . ?
H21 N21 H23 106(3) . . ?
H22 N21 H23 111(3) . . ?
H21 N21 H24 102(3) . . ?
H22 N21 H24 106(3) . . ?
H23 N21 H24 120(3) . . ?
H27 N23 H28 102(3) . . ?
H27 N23 H29 121(4) . . ?
H28 N23 H29 117(3) . . ?
H27 N23 H30 103(3) . . ?
H28 N23 H30 112(3) . . ?
H29 N23 H30 101(3) . . ?

loop_
_geom_hbond_atom_site_label_D
_geom_hbond_atom_site_label_H
_geom_hbond_atom_site_label_A
_geom_hbond_distance_DH
_geom_hbond_distance_HA
_geom_hbond_distance_DA
_geom_hbond_angle_DHA
_geom_hbond_site_symmetry_A
N1 H1 O27  0.88(4) 2.68(3) 3.311(3) 129(3) 2_675
N1 H3 O8  0.75(4) 2.21(4) 2.936(3) 164(4) .
N1 H3 O7  0.75(4) 2.81(4) 3.270(3) 123(3) .
N1 H4 O22  0.89(4) 2.68(3) 3.189(3) 117(3) 1_565
N2 H5A O2  0.78(4) 2.13(4) 2.904(3) 173(3) .
N2 H5B O8  0.79(4) 2.47(4) 2.985(3) 124(3) .
N2 H5B O25  0.79(4) 2.53(4) 3.170(3) 140(3) .
N3 H9 O23  0.79(3) 2.13(4) 2.925(3) 176(3) .
N3 H9 O24  0.79(3) 2.82(3) 3.287(3) 120(3) .
N3 H10 O6  0.91(4) 1.97(4) 2.849(3) 162(3) .
N3 H10 O8  0.91(4) 2.66(4) 3.307(3) 129(3) .
N4 H11A O24  0.82(4) 2.55(3) 3.069(3) 122(3) .
N4 H11A O1  0.82(4) 2.57(4) 3.198(3) 135(3) .
N21 H21 O6  0.84(3) 2.73(3) 3.223(3) 119(2) 2_665
N21 H23 O27  0.83(4) 2.03(4) 2.858(3) 177(3) .
N21 H23 O28  0.83(4) 2.77(3) 3.266(3) 120(3) .
N23 H29 O3  0.82(4) 2.74(4) 3.202(3) 117(3) .

_diffrn_measured_fraction_theta_max    0.937
_diffrn_reflns_theta_full              28.77
_diffrn_measured_fraction_theta_full   0.937
_refine_diff_density_max    0.532
_refine_diff_density_min   -0.718
_refine_diff_density_rms    0.084

#===END
